# Supplementary material for: Variation in the Adiponutrin Gene Influences Its Expression and Associates With Obesity
Source: Oxford University Press journal article supplement (doi:10.2337/diabetes.55.03.06.db05-1075), 2006-03-01
Supplement: 826-sup-db1075supplement2.doc [file 826-sup-db1075supplement2.doc]

***Supplement 2:*  Haplotype analysis of single nucleotide polymorphisms (SNP) in the adiponutrin (*ADPN*) gene.**

| **Haplotype** | **Frequence** | **Case:Control ratios** | **Chi square** | **P-value** | **Permutation P-value** |
| --- | --- | --- | --- | --- | --- |
| **Block 1** (rs738409*/ rs5764034) |  |  |  |  |  |
| CA | 0.39 | 0.40: 0.38 | 0.64 | 0.42 | 0.99 |
| CC | 0.37 | 0.39: 0.35 | 1.44 | 0.23 | 0.89 |
| GC | 0.24 | 0.21: 0.27 | 5.14 | 0.023 | 0.19 |
| **Block 2** (rs2076211/rs2072907*/ |  |  |  |  |  |
| rs1010022/rs3810622*/rs2294919) |
| CGATC | 0.38 | 0.39: 0.37 | 0.70 | 0.40 | 0.98 |
| CGACT | 0.23 | 0.25: 0.21 | 2.20 | 0.14 | 0.72 |
| CGACC | 0.19 | 0.19: 0.18 | 0.54 | 0.46 | 1.00 |
| TCGTC | 0.18 | 0.15: 0.21 | 6.31 | 0.012 | 0.10 |
| CCGTC | 0.016 | 0.011: 0.025 | 2.85 | 0.092 | 0.56 |

*Predicted tagSNPs using the Tagger program (Paul de Bakker, http://www.broad.mit.edu/mpg/tagger/). 10000

permutations.
